# Supplementary material for: Poly(4-vinylpyridine)-block-poly(N-acryloylpiperidine) diblock copolymers: synthesis, self-assembly and interaction
Source: Royal Society of Chemistry journal article supplement (doi:10.1039/c5py00952a), 2015-01-01
Supplement: c5py00952a1.pdf [file c5py00952a1.pdf]

Supporting information for

**Poly(4-Vinylpyridine)-*block*-poly(*N*-acryloylpiperidine) Diblock Copolymers: Synthesis, Self-Assembly and Interaction**

Anton H. Hofman, Gert O. R. Alberda van Ekenstein, Albert J. J. Woortman, Gerrit ten Brinke\* and Katja Loos\*

Department of Polymer Chemistry, Zernike Institute for Advanced Materials, University of Groningen, Nijenborgh 4, 9747 AG Groningen, The Netherlands

\*g.ten.brinke@rug.nl and k.u.loos@rug.nl

## Results and discussion

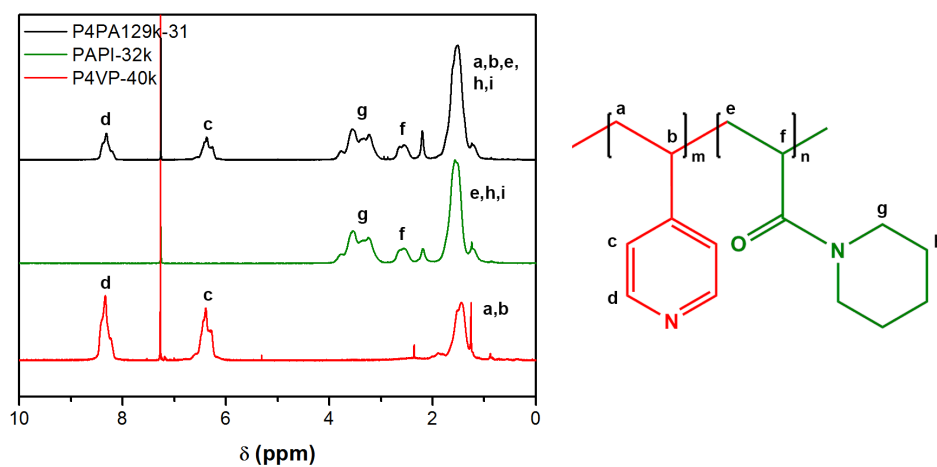

**Figure S1:**  $^1\text{H}$ -NMR spectra of P4VP-40k, PAPI-32k and P4PA129k-31. Deuterated chloroform ( $\text{CDCl}_3$ ) was used as solvent (7.26 ppm). The composition of the block copolymer was calculated by using two of P4VP's aromatic protons (*d*) and using the full integral of PAPI (*e* – *i*) after correction of this region (1.0 – 4.0 ppm) for P4VP (*a*, *b*).

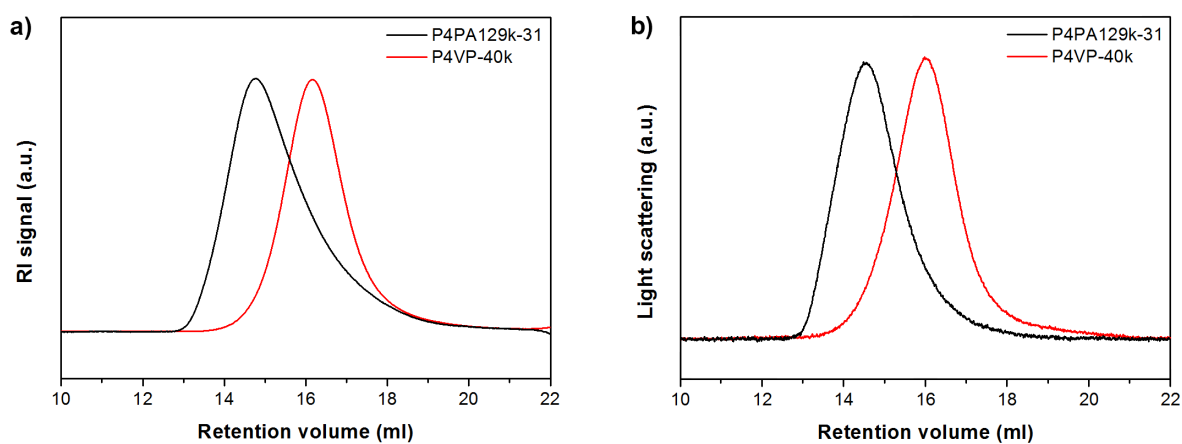

**Figure S2:** GPC chromatograms of P4PA129k-31 and its precursor P4VP-40k. Refractive index (a) and light scattering signal (b).

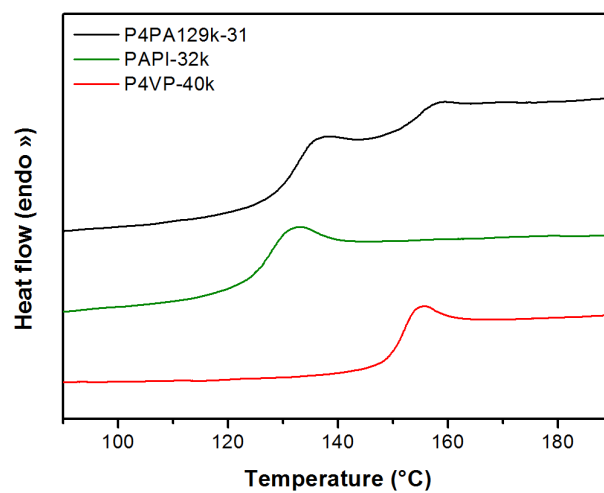

**Figure S3:** DSC thermograms of P4VP-40k, PAPI-32k and P4PA129k-31 recorded at  $10\text{ }^{\circ}\text{C}\cdot\text{min}^{-1}$  (2<sup>nd</sup> heating cycle).

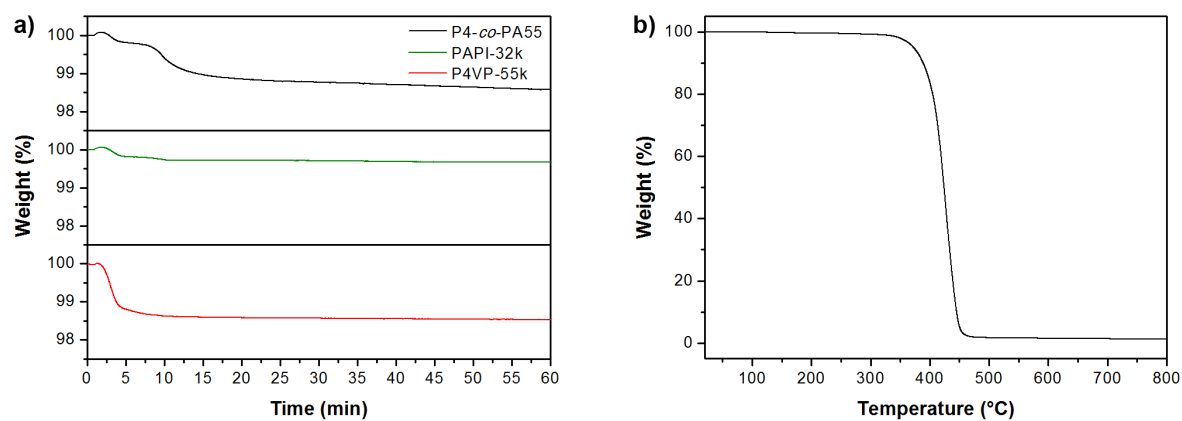

**Figure S4:** TGA data of homo- and copolymers. P4-*co*-PA55, PAPI-32k and P4VP-55k held at  $200\text{ }^{\circ}\text{C}$  for an hour (a). P4PA57k-47 heated to  $900\text{ }^{\circ}\text{C}$  at  $10\text{ }^{\circ}\text{C}\cdot\text{min}^{-1}$  (b).

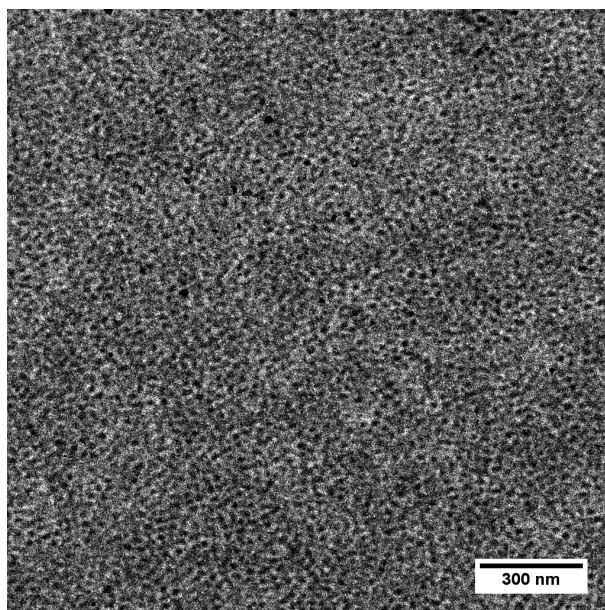

**Figure S5:** TEM image of P4PA80k-10 at lower magnification. P4VP appears dark due to staining with iodine.

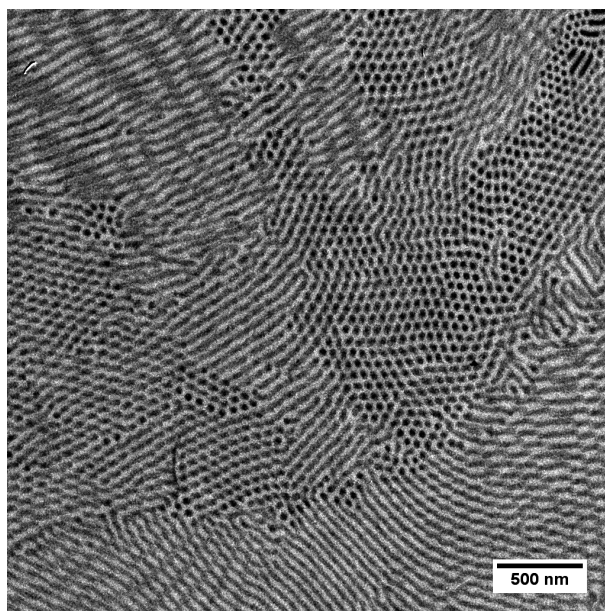

**Figure S6:** TEM image of P4PA131k-22 at lower magnification. P4VP appears dark due to staining with iodine.

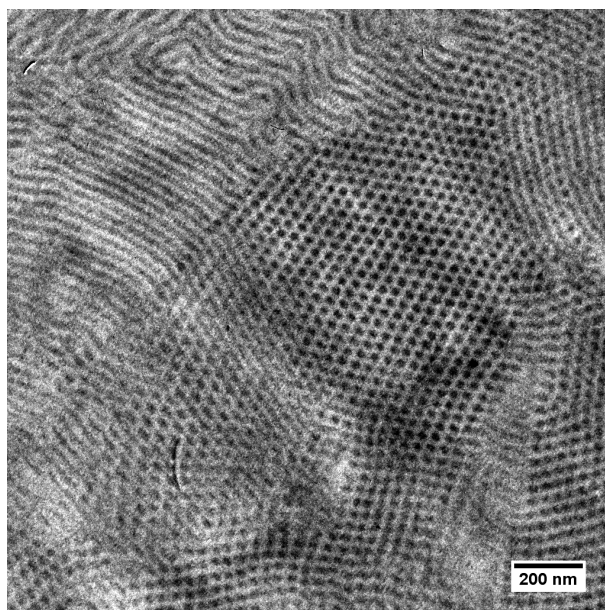

**Figure S7:** TEM image of P4PA61k-23 at lower magnification. P4VP appears dark due to staining with iodine.

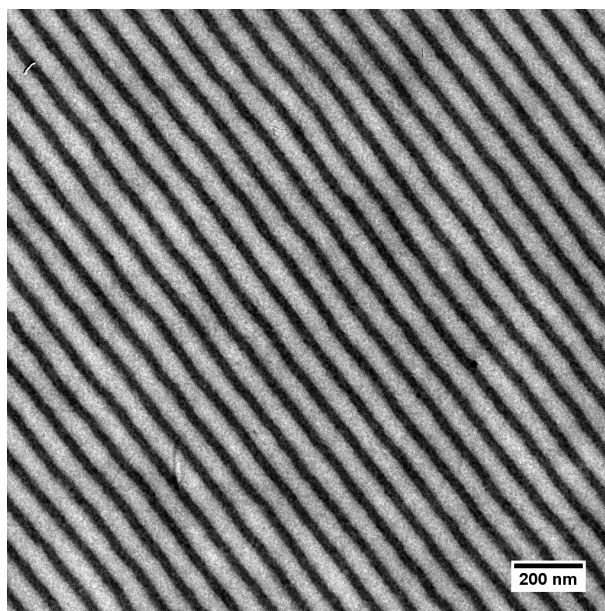

**Figure S8:** TEM image of P4PA129k-31 at lower magnification. P4VP appears dark due to staining with iodine.

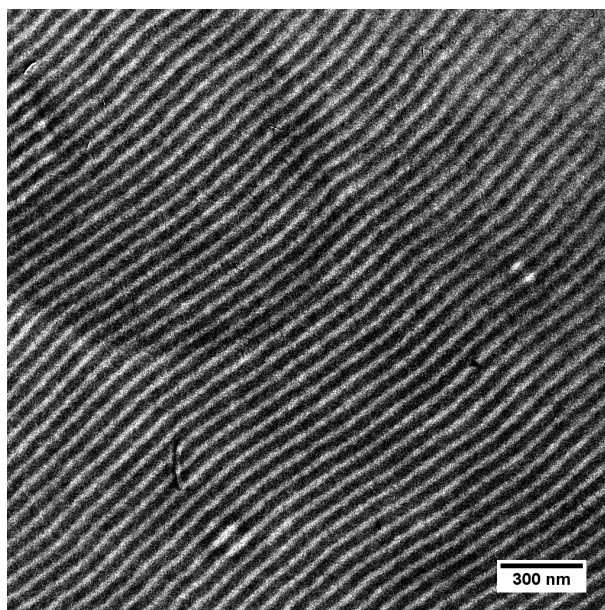

**Figure S9:** TEM image of P4PA57k-47 at lower magnification. P4VP appears dark due to staining with iodine.

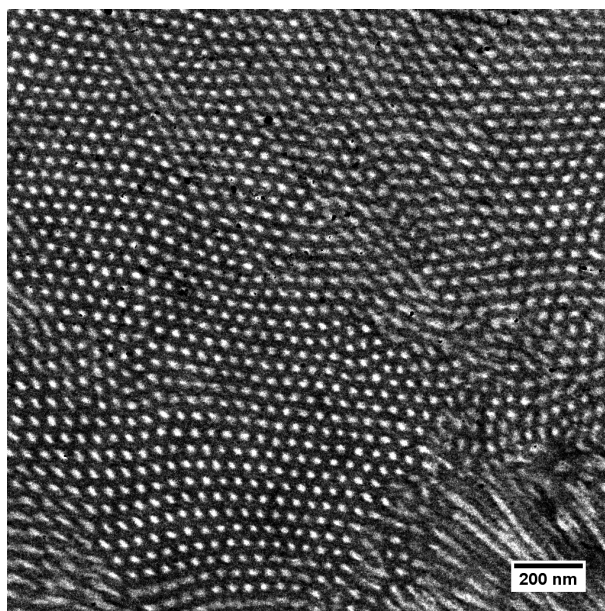

**Figure S10:** TEM image of P4PA78k-70 at lower magnification. P4VP appears dark due to staining with iodine.

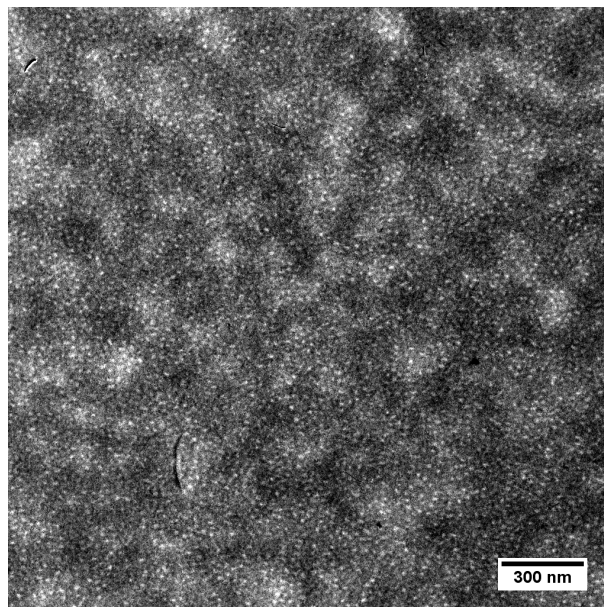

**Figure S11:** TEM image of P4PA48k-83 at lower magnification. P4VP appears dark due to staining with iodine.

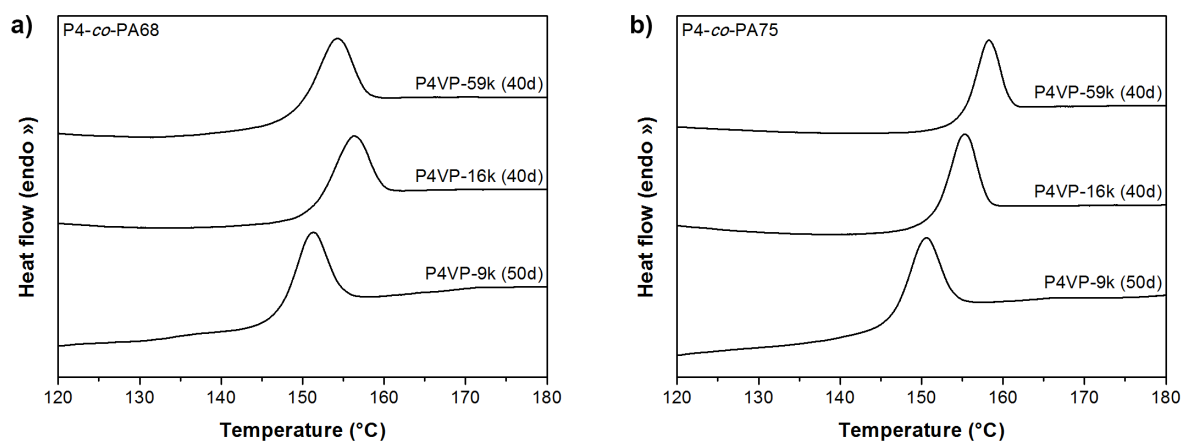

**Figure S12:** First heating scans of thermally aged P4-*co*-PA68 (a) and P4-*co*-PA75 (b) blends. P4VP-9k-based blends were annealed at 125 °C, while P4VP-16k and P4VP-59k blends at 131 °C.
